# Supplementary material for: Population Genomic Analysis of 1,777 Extended-Spectrum Beta-Lactamase-Producing Klebsiella pneumoniae Isolates, Houston, Texas: Unexpected Abundance of Clonal Group 307
Source: PubMed Central journal article supplement (PMC5433097; doi:10.1128/mbio.00489-17), 2017-05-16

Figure S2

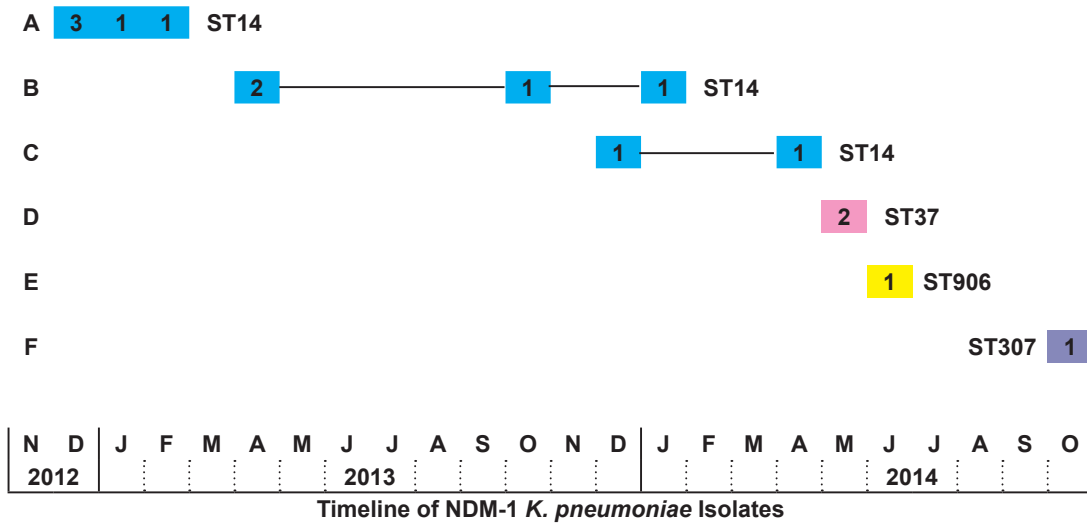

Supplement: mbo003173305sf2.pdf [file mbo003173305sf2.pdf]
