# Supplementary material for: Population Genomic Analysis of 1,777 Extended-Spectrum Beta-Lactamase-Producing Klebsiella pneumoniae Isolates, Houston, Texas: Unexpected Abundance of Clonal Group 307
Source: PubMed Central journal article supplement (PMC5433097; doi:10.1128/mbio.00489-17), 2017-05-16
Supplement: mbo003173305st2.pdf [file mbo003173305st2.pdf]

**Table S2. Sequence types of strains recovered in this study.**

| ST | Strains (n) |
|----|-------------|
| 11 | 1           |
| 13 | 25          |
| 14 | 13          |
| 15 | 49          |
| 16 | 92          |
| 17 | 17          |
| 20 | 6           |
| 22 | 6           |
| 25 | 12          |
| 26 | 1           |
| 29 | 5           |
| 35 | 5           |
| 36 | 10          |
| 37 | 18          |
| 39 | 1           |
| 42 | 5           |
| 45 | 16          |
| 48 | 1           |
| 76 | 2           |

|     |     |
|-----|-----|
| 101 | 3   |
| 111 | 6   |
| 134 | 3   |
| 138 | 1   |
| 147 | 20  |
| 151 | 1   |
| 187 | 2   |
| 196 | 1   |
| 219 | 1   |
| 234 | 3   |
| 258 | 382 |
| 261 | 1   |
| 273 | 5   |
| 280 | 32  |
| 295 | 2   |
| 307 | 526 |
| 321 | 1   |
| 323 | 3   |
| 327 | 6   |
| 336 | 1   |
| 340 | 1   |

|     |    |
|-----|----|
| 342 | 1  |
| 348 | 1  |
| 392 | 12 |
| 405 | 9  |
| 412 | 1  |
| 418 | 1  |
| 429 | 2  |
| 432 | 2  |
| 454 | 2  |
| 461 | 1  |
| 462 | 7  |
| 471 | 1  |
| 476 | 2  |
| 551 | 9  |
| 611 | 1  |
| 628 | 9  |
| 656 | 1  |
| 661 | 1  |
| 681 | 2  |
| 716 | 5  |
| 753 | 1  |

|      |   |
|------|---|
| 784  | 2 |
| 788  | 1 |
| 791  | 1 |
| 869  | 2 |
| 874  | 1 |
| 880  | 1 |
| 884  | 4 |
| 895  | 2 |
| 896  | 3 |
| 906  | 1 |
| 978  | 2 |
| 985  | 1 |
| 1017 | 3 |
| 1107 | 1 |
| 1114 | 1 |
| 1174 | 1 |
| 1213 | 2 |
| 1228 | 1 |
| 1296 | 1 |
| 1412 | 4 |
| 1427 | 7 |

|       |   |
|-------|---|
| 1440  | 8 |
| 1444  | 1 |
| 1456  | 2 |
| 1486  | 1 |
| 1500  | 1 |
| 1602  | 1 |
| 1694  | 2 |
| 1758  | 2 |
| 1777  | 1 |
| 1808  | 1 |
| 1823  | 1 |
| 1887  | 3 |
| 1962  | 1 |
| 2133  | 1 |
| 2185  | 1 |
| 2202  | 2 |
| 2351  | 2 |
| 1234* | 7 |
| 147*  | 1 |
| 16*   | 1 |
| 1662* | 1 |

|       |     |
|-------|-----|
| 17*   | 1   |
| 2079* | 1   |
| 2289* | 1   |
| 258*  | 2   |
| 307*  | 18  |
| 36*   | 1   |
| 395*  | 1   |
| 414*  | 1   |
| 42*   | 3   |
| 45*   | 1   |
| 461*  | 2   |
| 551*  | 1   |
| 560*  | 1   |
| 896*  | 1   |
| NF    | 51  |
| NF*   | 251 |

Abbreviations: NF, novel allele combination. \* indicates polymorphism in allele sequence.
