# Supplementary material for: Population Genomic Analysis of 1,777 Extended-Spectrum Beta-Lactamase-Producing Klebsiella pneumoniae Isolates, Houston, Texas: Unexpected Abundance of Clonal Group 307
Source: PubMed Central journal article supplement (PMC5433097; doi:10.1128/mbio.00489-17), 2017-05-16
Supplement: mbo003173305st3.pdf [file mbo003173305st3.pdf]

**Table S3. Strains sequenced to closure.**

| <b>Strain</b>  | <b>ST</b>  | <b>Chr/Plasmid</b> | <b>Contig Size(s) (bp)</b> |                |
|----------------|------------|--------------------|----------------------------|----------------|
| <b>KPN11</b>   | <b>307</b> | <b>Chr</b>         | <b>5,069,972</b>           |                |
|                |            |                    | <b>270,681</b>             |                |
|                |            | <b>pKPN11-1</b>    | <b>330,476</b>             |                |
|                |            | <b>pKPN11-2</b>    | <b>79,539</b>              |                |
| <b>KPN528</b>  | <b>14</b>  | <b>Chr</b>         | <b>5,383,018</b>           |                |
|                |            |                    | <b>pKPN528-1</b>           | <b>292,471</b> |
|                |            |                    | <b>pKPN528-2</b>           | <b>221,428</b> |
|                |            |                    | <b>pKPN528-3</b>           | <b>76,158</b>  |
| <b>KPN1481</b> | <b>906</b> | <b>Chr</b>         | <b>5,554,150</b>           |                |
|                |            |                    | <b>pKPN1481-1</b>          | <b>347,748</b> |
|                |            |                    | <b>pKPN1481-2</b>          | <b>161,100</b> |
|                |            |                    | <b>pKPN1481-3</b>          | <b>20,380</b>  |
|                |            |                    | <b>pKPN1481-4</b>          | <b>12,376</b>  |
|                |            |                    | <b>pKPN1481-5</b>          | <b>10,373</b>  |
| <b>KPN1482</b> | <b>37</b>  | <b>Chr</b>         | <b>5,591,645</b>           |                |
|                |            |                    | <b>pKPN1482-1</b>          | <b>180,210</b> |
|                |            |                    | <b>pKPN1482-2</b>          | <b>97,202</b>  |
|                |            |                    | <b>pKPN1482-3</b>          | <b>74,177</b>  |
|                |            |                    | <b>pKPN1482-4</b>          | <b>12,540</b>  |
|                |            |                    | <b>pKPN1482-5</b>          | <b>9,510</b>   |
| <b>BK13043</b> | <b>258</b> | <b>Chr</b>         | <b>5,594,550</b>           |                |

|  |  |                   |                |
|--|--|-------------------|----------------|
|  |  | <b>pBK13043-1</b> | <b>232,540</b> |
|  |  | <b>pBK13043-2</b> | <b>57,580</b>  |
|  |  | <b>pBK13043-3</b> | <b>11,984</b>  |

Abbreviations: ST, multilocus sequence type; Chr, chromosome.
