# Supplementary material for: Population Genomic Analysis of 1,777 Extended-Spectrum Beta-Lactamase-Producing Klebsiella pneumoniae Isolates, Houston, Texas: Unexpected Abundance of Clonal Group 307
Source: PubMed Central journal article supplement (PMC5433097; doi:10.1128/mbio.00489-17), 2017-05-16
Supplement: mbo003173305st4.pdf [file mbo003173305st4.pdf]

**Table S4. Annotated genes present in NJST258\_2 but not CG307 strain KPN11.**

| ref_genome_patric_id   | ref_genomeFunction annotated in PATRIC                                      | start   | end     |
|------------------------|-----------------------------------------------------------------------------|---------|---------|
| fig 1420012.6.peg.636  | Mobile element protein                                                      | 654753  | 655952  |
| fig 1420012.6.peg.637  | orf, conserved hypothetical protein                                         | 655962  | 656150  |
| fig 1420012.6.peg.769  | Mobile element protein                                                      | 785412  | 785564  |
| fig 1420012.6.peg.770  | Chromosome partitioning ATPase in PFGI-1-like cluster, ParA-like            | 786234  | 787106  |
| fig 1420012.6.peg.773  | Protein with ParB-like nuclease domain in PFGI-1-like cluster               | 788846  | 790468  |
| fig 1420012.6.peg.775  | FIG141751: hypothetical protein in PFGI-1-like cluster                      | 791052  | 792269  |
| fig 1420012.6.peg.781  | FIG141694: hypothetical protein in PFGI-1-like cluster                      | 798306  | 799028  |
| fig 1420012.6.peg.782  | Putative uncharacterized protein STY4534 (Putative uncharacterized protein) | 799745  | 800197  |
| fig 1420012.6.peg.783  | PilL                                                                        | 800321  | 800890  |
| fig 1420012.6.peg.785  | probable exported protein STY4558                                           | 801744  | 802361  |
| fig 1420012.6.peg.788  | Coupling protein VirD4, ATPase required for T-DNA transfer                  | 803456  | 805555  |
| fig 1420012.6.peg.790  | putative membrane protein                                                   | 805815  | 806573  |
| fig 1420012.6.peg.797  | putative exported protein                                                   | 809830  | 810483  |
| fig 1420012.6.peg.799  | putative exported protein                                                   | 811328  | 812809  |
| fig 1420012.6.peg.800  | putative lipoprotein                                                        | 812823  | 813221  |
| fig 1420012.6.peg.801  | Type IV secretory pathway, VirB4 components                                 | 813221  | 815995  |
| fig 1420012.6.peg.805  | Glycosaminoglycan attachment site                                           | 817441  | 818808  |
| fig 1420012.6.peg.810  | corresponds to STY4575 from Accession AL513382: Salmonella typhi CT18       | 823995  | 824390  |
| fig 1420012.6.peg.814  | putative membrane protein                                                   | 827106  | 828635  |
| fig 1420012.6.peg.820  | COG1396: Predicted transcriptional regulators                               | 830907  | 831101  |
| fig 1420012.6.peg.828  | Antirestriction protein                                                     | 837438  | 838418  |
| fig 1420012.6.peg.830  | Mobile element protein                                                      | 839859  | 840806  |
| fig 1420012.6.peg.1747 | O antigen biosynthesis rhamnosyltransferase rfbN (EC 2.4.1.-)               | 1804929 | 1805837 |
| fig 1420012.6.peg.1749 | predicted glycosyltransferase                                               | 1806896 | 1807657 |
| fig 1420012.6.peg.1754 | dTDP-4-dehydrorhamnose reductase (EC 1.1.1.133)                             | 1812250 | 1813140 |
| fig 1420012.6.peg.1755 | dTDP-4-dehydrorhamnose 3,5-epimerase (EC 5.1.3.13)                          | 1813155 | 1813709 |
| fig 1420012.6.peg.1763 | capsular polysaccharide biosynthesis protein                                | 1820697 | 1821731 |
| fig 1420012.6.peg.1764 | Phage tail fibers                                                           | 1822000 | 1823577 |
| fig 1420012.6.peg.1832 | Conjugal transfer protein traA                                              | 1887562 | 1889082 |
| fig 1420012.6.peg.1837 | Incl1 plasmid conjugative transfer prepilin PilS                            | 1893277 | 1893846 |

|                        |                                                                            |         |         |
|------------------------|----------------------------------------------------------------------------|---------|---------|
| fig 1420012.6.peg.1838 | PilV-like protein                                                          | 1894050 | 1895609 |
| fig 1420012.6.peg.1839 | Type III restriction-modification system restriction subunit (EC 3.1.21.5) | 1896072 | 1899032 |
| fig 1420012.6.peg.1840 | Type III restriction-modification system methylation subunit (EC 2.1.1.72) | 1899042 | 1900892 |
| fig 1420012.6.peg.1841 | SpnT                                                                       | 1901086 | 1902474 |
| fig 1420012.6.peg.2030 | Uropathogenic specific protein                                             | 2090595 | 2091950 |
| fig 1420012.6.peg.2035 | Uropathogenic specific protein                                             | 2094003 | 2095283 |
| fig 1420012.6.peg.2043 | serine/threonine kinase                                                    | 2099278 | 2100171 |
| fig 1420012.6.peg.2045 | serine/threonine kinase                                                    | 2100355 | 2101248 |
| fig 1420012.6.peg.2046 | serine/threonine kinase                                                    | 2101424 | 2102317 |
| fig 1420012.6.peg.2047 | serine/threonine kinase                                                    | 2102493 | 2103383 |
| fig 1420012.6.peg.2542 | Phosphoglycerate mutase (EC 5.4.2.1)                                       | 2591361 | 2591792 |
| fig 1420012.6.peg.2544 | Probable signal peptide protein                                            | 2593420 | 2594181 |
| fig 1420012.6.peg.2620 | Acetyltransferase, GNAT family                                             | 2668462 | 2668875 |
| fig 1420012.6.peg.2720 | expressed protein                                                          | 2760682 | 2761848 |
| fig 1420012.6.peg.3029 | Cold shock protein CspG                                                    | 3054694 | 3054882 |
| fig 1420012.6.peg.3031 | Beta-mannosidase (EC 3.2.1.25)                                             | 3055267 | 3055404 |
| fig 1420012.6.peg.3101 | D-glycerate 2-kinase (EC 2.7.1.165)                                        | 3124051 | 3125310 |
| fig 1420012.6.peg.3485 | Prophage P2 OGR protein                                                    | 3520689 | 3520907 |
| fig 1420012.6.peg.3725 | orf, conserved hypothetical protein                                        | 3761888 | 3762076 |
| fig 1420012.6.peg.3726 | Mobile element protein                                                     | 3762086 | 3763285 |
| fig 1420012.6.peg.3900 | Response regulator receiver protein                                        | 3933204 | 3933821 |
| fig 1420012.6.peg.3906 | Transcriptional regulator, LuxR family                                     | 3940054 | 3940689 |
| fig 1420012.6.peg.4167 | DNA polymerase IV                                                          | 4207777 | 4207947 |
| fig 1420012.6.peg.4466 | SSU ribosomal protein S20p                                                 | 4532925 | 4533110 |
| fig 1420012.6.peg.4541 | Regulator of L-galactonate catabolism YjjM                                 | 4610418 | 4611332 |
| fig 1420012.6.peg.4629 | ORF25                                                                      | 4701142 | 4701780 |
