# Supplementary material for: Population Genomic Analysis of 1,777 Extended-Spectrum Beta-Lactamase-Producing Klebsiella pneumoniae Isolates, Houston, Texas: Unexpected Abundance of Clonal Group 307
Source: PubMed Central journal article supplement (PMC5433097; doi:10.1128/mbio.00489-17), 2017-05-16
Supplement: mbo003173305st6.pdf [file mbo003173305st6.pdf]

**Table S6. Strains used for RNA sequence analysis. Genome analysis detected the presence (+) or absence (-) of the genes encoding the NDM-1 and OXA-49 beta-lactamases.**

| <b>Strain</b> | <b>Clonal group</b> | <b>State</b> | <b>Year</b> | <b>NDM-1</b> | <b>OXA-48</b> |
|---------------|---------------------|--------------|-------------|--------------|---------------|
| BK30660       | 258                 | NJ           | 2010        | -            | -             |
| BK30684       | 258                 | NJ           | 2010        | -            | -             |
| KPN5          | 307                 | TX           | 2011        | -            | -             |
| KPN11         | 307                 | TX           | 2011        | -            | -             |
| KPN113        | 258                 | TX           | 2011        | -            | -             |
| KPN137        | 307                 | TX           | 2011        | -            | -             |
| KPN261        | 258                 | TX           | 2012        | -            | -             |
| KPN528        | 14                  | TX           | 2012        | +            | +             |
| KPN1402       | 14                  | TX           | 2014        | +            | -             |
| KPN1904       | 327                 | TX           | 2014        | -            | -             |
